# Supplementary material
Source: Springer Nature journal article supplement (https://www.springermedizin.de/resource/supplementary/13012_2012_536_MOESM5_ESM.pdf/9630198)
Supplement: MOESM5 [file 9630198]

Additional file 5: Quality assessment

Excluded due to major limitations: *n*=48

| Study (Year)           | Design |         | Content | Sample size | Instruments used | Test statistics | Significance | Level of evidence |          |      | Inclusion |
|------------------------|--------|---------|---------|-------------|------------------|-----------------|--------------|-------------------|----------|------|-----------|
|                        | type   | ranking |         |             |                  |                 |              | low               | moderate | high |           |
| Abbot (2006)           | UBA    | 0       | 1       | 0           | 0                | 1               | 1            |                   |          | 3*   | No        |
| Barreau (2003)         | UBA    | 0       | 1       | 0           | 1                | 1               | 1            |                   |          | 3*   | No        |
| Baker (1998)           | UBA    | 0       | 1       | 0           | 1                | 0               | 0            | 2                 |          |      | No        |
| Berhe (2006)           | UBA    | 0       | 1       | 0           | 0                | 1               | 1            |                   |          | 3*   | No        |
| Bhojani (2008)         | UBA    | 0       | 0       | 0           | 1                | 0               | 0            | 1                 |          |      | No        |
| Bischoff (2000)        | UBA    | 0       | 1       | 0           | 0                | 1               | 1            |                   |          | 3*   | No        |
| Bittner (2002)         | UBA    | 0       | 1       | 0           | 0                | 1               | 1            |                   |          | 3*   | No        |
| Coignard (1998)        | UBA    | 0       | 1       | 0           | 0                | 1               | 1            |                   |          | 3*   | No        |
| Colombo (2002)         | UBA    | 1       | 1       | 0           | 0                | 0               | 0            | 2                 |          |      | No        |
| Connoly (1998)         | UBA    | 0       | 0       | 0           | 0                | 0               | 0            | 0                 |          |      | No        |
| Conrad (2001)          | UBA    | 0       | 0       | 0           | 0                | 1               | 1            | 2                 |          |      | No        |
| Coopersmith (2004)     | UBA    | 0       | 1       | 0           | 0                | 1               | 1            |                   |          | 3*   | No        |
| Cromer (2007)          | UBA    | 0       | 0       | 0           | 1                | 0               | 0            | 1                 |          |      | No        |
| Danchaivijitr (2005-1) | UBA    | 0       | 1       | 0           | 0                | 1               | 1            |                   |          | 3*   | No        |
| Danchaivijitr (2005-2) | UBA    | 0       | 0       | 0           | 0                | 1               | 1            | 2                 |          |      | No        |
| Das-Neves (2006)       | UBA    | 0       | 1       | 0           | 0                | 0               | 0            | 1                 |          |      | No        |
| Donowitz (1986)        | UBA    | 0       | 1       | 0           | 1                | 0               | 0            | 2                 |          |      | No        |
| Dubbert (1990)         | UBA    | 0       | 1       | 0           | 0                | 0               | 0            | 1                 |          |      | No        |
| Ebnother (2007)        | UBA    | 0       | 1       | 0           | 0                | 0               | 0            | 1                 |          |      | No        |
| Gill (2009)            | UBA    | 0       | 1       | 0           | 0                | 1               | 1            | 3-                |          |      | No        |

|                     |     |   |   |   |   |   |   |    |    |    |
|---------------------|-----|---|---|---|---|---|---|----|----|----|
| Girard (2001)       | UBA | 0 | 1 | 0 | 0 | 1 | 1 |    | 3* | No |
| Graham (1990)       | UBA | 0 | 1 | 0 | 0 | 1 | 1 |    | 3* | No |
| Grayson (2008)      | UBA | 0 | 1 | 0 | 0 | 0 | 1 | 2  |    | No |
| Higuera (2005)      | UBA | 0 | 1 | 0 | 0 | 1 | 1 |    | 3* | No |
| Johnson (2005)      | UBA | 0 | 1 | 0 | 0 | 1 | 1 |    | 3* | No |
| Lankfort (2003)     | UBA | 0 | 1 | 0 | 0 | 1 | 1 |    | 3* | No |
| Lederer (2009)      | ITS | 1 | 1 | 0 | 0 | 0 | 0 | 2  |    | No |
| Maury (2000)        | UBA | 0 | 1 | 0 | 0 | 1 | 1 |    | 3* | No |
| McGuckin (1999)     | UBA | 0 | 1 | 0 | 0 | 1 | 1 |    | 3* | No |
| McGuckin (2001)     | UBA | 0 | 1 | 0 | 0 | 1 | 1 |    | 3* | No |
| McGuckin (2004)     | UBA | 0 | 1 | 0 | 0 | 1 | 1 |    | 3* | No |
| McGuckin (2004)     | UBA | 0 | 1 | 0 | 0 | 0 | 1 | 2  |    | No |
| Ozyazicioglu (2008) | UBA | 0 | 0 | 0 | 0 | 1 | 1 | 2  |    | No |
| Panhotra (2004)     | UBA | 0 | 1 | 0 | 0 | 0 | 1 |    | 3* | No |
| Pessoa-Silva (2007) | UBA | 0 | 1 | 0 | 0 | 1 | 1 | 3- |    | No |
| Rosenthal (2004)    | UBA | 0 | 1 | 0 | 0 | 1 | 1 |    | 3* | No |
| Rosenthal (2005)    | UBA | 0 | 1 | 0 | 0 | 1 | 1 |    | 3* | No |
| Salemi (2002)       | UBA | 0 | 1 | 0 | 1 | 0 | 0 | 2  |    | No |
| Sanchez (2007)      | UBA | 0 | 1 | 0 | 0 | 0 | 1 |    | 3- | No |
| Shaw (2003)         | UBA | 0 | 1 | 0 | 0 | 0 | 0 | 1  |    | No |
| Sud (2007)          | UBA | 0 | 1 | 0 | 0 | 0 | 0 | 1  |    | No |
| Swoboda (2004)      | UBA | 0 | 1 | 0 | 0 | 1 | 1 |    | 3* | No |
| Swoboda (2007)      | UBA | 0 | 1 | 0 | 0 | 1 | 1 |    | 3- | No |
| Thomas (2005)       | UBA | 0 | 1 | 0 | 0 | 0 | 0 | 1  |    | No |
| Tibbals (1996)      | UBA | 0 | 1 | 0 | 1 | 0 | 0 | 2  |    | No |
| Tolentino (2007)    | UBA | 0 | 1 | 0 | 0 | 0 | 1 | 2  |    | No |

|                  |     |   |   |   |   |   |   |    |    |
|------------------|-----|---|---|---|---|---|---|----|----|
| Venkatesh (2008) | UBA | 0 | 1 | 0 | 0 | 1 | 1 | 3- | No |
| Whitby (2008)    | UBA | 0 | 1 | 0 | 0 | 1 | 1 | 3- | No |
